# Supplementary material
Source: MDPI journal article supplement (https://www.mdpi.com/2073-4441/15/1/100)
Supplement: s1 [file s1]

# Supplementary Materials:

**Table S1.** The lists of macroalgae samples used in this study.

| No | Code   | Species                      | Cultivation Site    | Origin   | Regional Zone |
|----|--------|------------------------------|---------------------|----------|---------------|
| 1  | GR_1   | <i>Gracilaria changii</i>    | Takalar tank        | Celebes  | East          |
| 2  | GR_2   |                              | Takalar tank        | Celebes  | East          |
| 3  | GR2_1  |                              | Jepara              | Java     | West          |
| 4  | GR2_2  |                              | Jepara              | Java     | West          |
| 5  | GR3_1  |                              | Kutuh               | Bali     | Center        |
| 6  | GR3_2  |                              | Kutuh               | Bali     | Center        |
| 7  | GR4_1  |                              | Takalar wild        | Celebes  | East          |
| 8  | GR4_2  |                              | Takalar wild        | Celebes  | East          |
| 9  | GR5_1  |                              | Takalar sea         | Celebes  | East          |
| 10 | GR5_2  |                              | Takalar sea         | Celebes  | East          |
| 11 | GR6_1  |                              | Takalar pond        | Celebes  | East          |
| 12 | GR6_2  |                              | Takalar pond        | Celebes  | East          |
| 13 | GR7_1  |                              | Maros               | Celebes  | East          |
| 14 | GR7_2  |                              | Maros               | Celebes  | East          |
| 15 | GR8_1  |                              | Maros hijau         | Celebes  | East          |
| 16 | GR8_2  |                              | Maros hijau         | Celebes  | East          |
| 17 | KA_1   |                              | Bentaeng            | Celebes  | East          |
| 18 | KA_2   |                              | Bentaeng            | Celebes  | East          |
| 19 | KAP_1  | <i>Kappaphycus alvarezii</i> | Serui               | Papua    | East          |
| 20 | KAP_2  |                              | Serui               | Papua    | East          |
| 21 | KA2_1  |                              | Penida              | Bali     | Center        |
| 22 | KA2_2  |                              | Penida              | Bali     | Center        |
| 23 | KA3_1  |                              | Kepulauan Geranting | Sumatera | West          |
| 24 | KA3_2  |                              | Kepulauan Geranting | Sumatera | West          |
| 25 | KA4_1  |                              | Lembongan           | Bali     | Center        |
| 26 | KA4_2  |                              | Lembongan           | Bali     | Center        |
| 27 | KA5_1  |                              | Takalar sea         | Celebes  | East          |
| 28 | KA5_2  |                              | Takalar sea         | Celebes  | East          |
| 29 | KA6_1  |                              | Banyuwangi          | Java     | West          |
| 30 | KA6_2  |                              | Banyuwangi          | Java     | West          |
| 31 | KA7_1  |                              | Puntondo            | Celebes  | East          |
| 32 | KA7_2  |                              | Puntondo            | Celebes  | East          |
| 33 | KA8_1  |                              | Pacitan Hijau       | Java     | West          |
| 34 | KA8_2  |                              | Pacitan Hijau       | Java     | West          |
| 35 | KA9_1  |                              | Pacitan             | Java     | West          |
| 36 | KA9_2  |                              | Pacitan             | Java     | West          |
| 37 | KA10_1 |                              | Kutuh               | Bali     | Center        |
| 38 | KA10_2 |                              | Kutuh               | Bali     | Center        |
| 39 | KA11_1 |                              | Kepulauan Geranting | Sumatera | West          |
| 40 | KA11_2 |                              | Kepulauan Geranting | Sumatera | West          |
| 41 | KA12_1 |                              | Kepulauan Geranting | Sumatera | West          |
| 42 | KA12_2 |                              | Kepulauan Geranting | Sumatera | West          |
| 43 | KA13_1 |                              | Kepulauan Geranting | Sumatera | West          |
| 44 | KA13_2 |                              | Kepulauan Geranting | Sumatera | West          |
| 45 | KA14_1 |                              | Lombok              | Lombok   | Center        |
| 46 | KA14_2 |                              | Lombok              | Lombok   | Center        |

|    |        |                     |          |        |
|----|--------|---------------------|----------|--------|
| 47 | KA15_1 | Jeneponto           | Celebes  | East   |
| 48 | KA15_2 | Jeneponto           | Celebes  | East   |
| 49 | SP_1   | Puntondo            | Celebes  | East   |
| 50 | SP_2   | Puntondo            | Celebes  | East   |
| 51 | SP2_1  | Jeneponto           | Celebes  | West   |
| 52 | SP2_2  | Jeneponto           | Celebes  | West   |
| 53 | SP3_1  | Nusa Ceningan       | Bali     | Center |
| 54 | SP3_2  | Nusa Ceningan       | Bali     | Center |
| 55 | SP4_1  | Lembongan           | Bali     | Center |
| 56 | SP4_2  | Lembongan           | Bali     | Center |
| 57 | SP5_1  | Pacitan             | Java     | West   |
| 58 | SP5_2  | Pacitan             | Java     | West   |
| 59 | SP6_1  | Tanakeke            | Celebes  | East   |
| 60 | SP6_2  | Tanakeke            | Celebes  | East   |
| 61 | SP7_1  | Jungutbatu          | Bali     | Center |
| 62 | SP7_2  | Jungutbatu          | Bali     | Center |
| 63 | SP8_1  | Kepulauan Geranting | Sumatera | West   |
| 64 | SP8_2  | Kepulauan Geranting | Sumatera | West   |
| 65 | SP9_1  | Banyuwangi          | Java     | West   |
| 66 | SP9_2  | Banyuwangi          | Java     | West   |
| 67 | SP10_1 | Lombok              | Lombok   | Center |
| 68 | SP10_2 | Lombok              | Lombok   | Center |
| 69 | SP11_1 | Bentaeng            | Celebes  | East   |
| 70 | SP11_2 | Bentaeng            | Celebes  | East   |

*Euchema spinosum*

Labeled GR belongs to species *Gracilaria changii*; KA belongs to *Kappaphycus alvarezii*; SP belongs to *Euchema spinosum*.

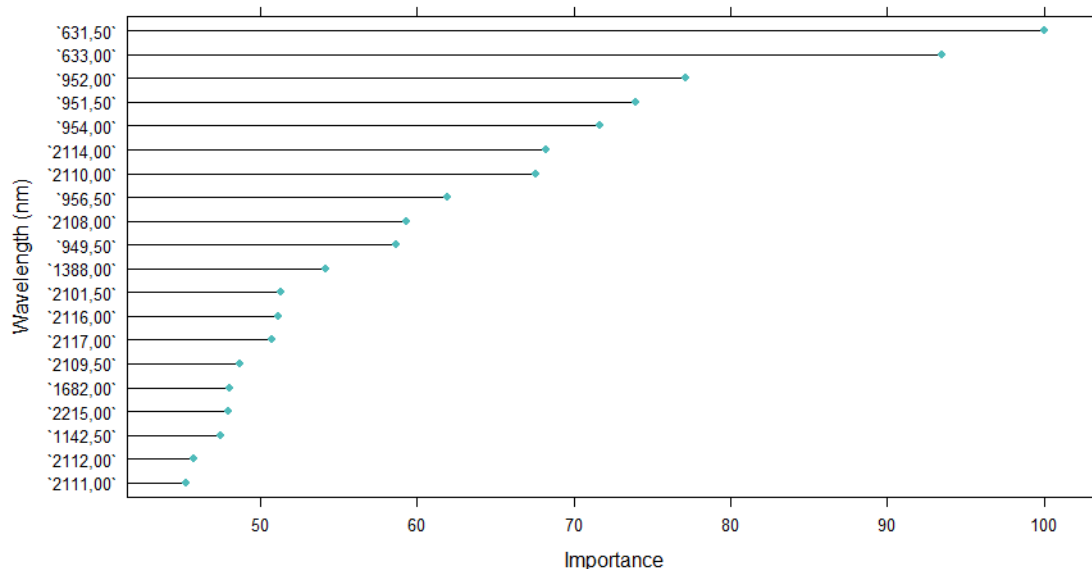

**Figure S1.** List of the 20 greatest important attributes in RF model and their relative important based on Vis-NIR data set ( $D_{70 \times 4187}$ ).
